# Supplementary material
Source: publisher site journal article supplement (https://www.spandidos-publications.com/2580/downloadSupplementary)
Supplement: Supplementary file 1 [file downloadSupplementary]

Figure S1. Graphical representation of gene expression level normalized above control for *MYB* and histone-lysine N-methyltransferase *SUV39H1* gene validation in microarray samples. Each bar represents a patient. The error bars represent technical replicates. S, sample.

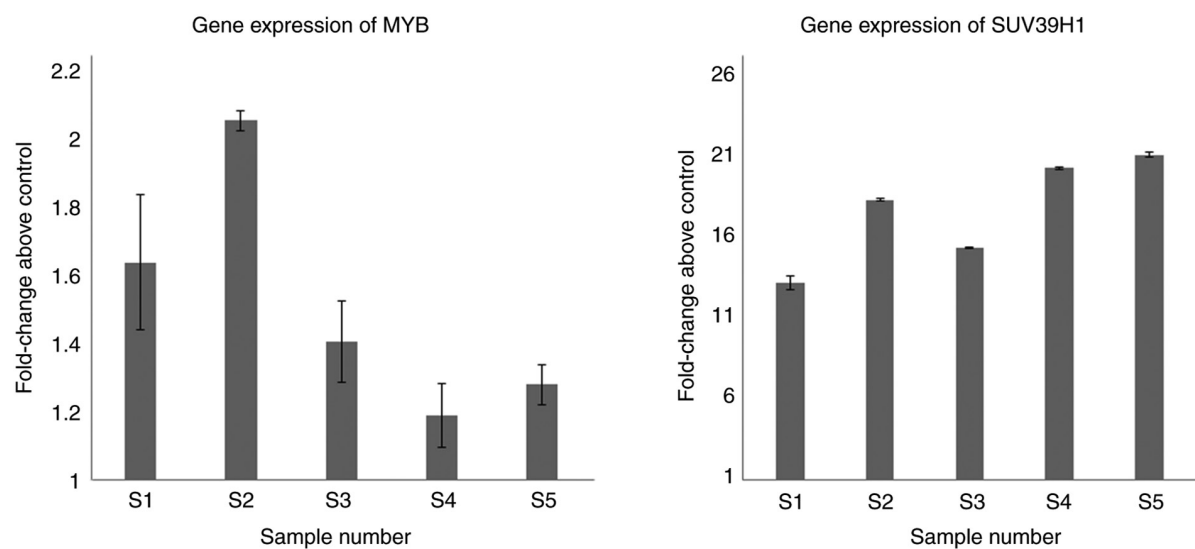



Figure S3. Transcription factor checkerboard table generated using StemChecker tool representing each input gene from the upregulated genes in *JAK2V617F* negative samples identified as a target gene. Blue rectangles indicate that a gene is included in the set of potential target genes as determined by the corresponding study. Each TF along with its corresponding study is colour coded next to the gene.

|                 | Hs_E2F4_Boyer1 | Hs_NANOG_Boyer1 | Hs_SMAD4_Kim | Hs_SOX4_Boyer1 | Hs_SUZ12_Lee | Hs_SMAD2_Kim | Hs_SMAD3_Kim | Hs_OCT4_Boyer1 |
|-----------------|----------------|-----------------|--------------|----------------|--------------|--------------|--------------|----------------|
|                 | X              | X               | X            | X              | X            | X            | X            | X              |
| ANKRD11(29123)  |                |                 |              |                |              |              |              |                |
| AGFG2(3268)     |                |                 |              |                |              |              |              |                |
| NFIA(4774)      |                |                 |              |                |              |              |              |                |
| YARS(8565)      |                |                 |              |                |              |              |              |                |
| ORC1L(4998)     |                |                 |              |                |              |              |              |                |
| TRAPPC9(83696)  |                |                 |              |                |              |              |              |                |
| TMEM173(340061) |                |                 |              |                |              |              |              |                |
| AFFI(4299)      |                |                 |              |                |              |              |              |                |
| MDC1(9656)      |                |                 |              |                |              |              |              |                |
| FBXL14(144699)  |                |                 |              |                |              |              |              |                |
| TUBG1(7283)     |                |                 |              |                |              |              |              |                |
| PRR11(55771)    |                |                 |              |                |              |              |              |                |
| HN1(51155)      |                |                 |              |                |              |              |              |                |
| SOC57(30837)    |                |                 |              |                |              |              |              |                |
| FBLN5(10516)    |                |                 |              |                |              |              |              |                |
| KIF16B(55614)   |                |                 |              |                |              |              |              |                |
| ZNRF3(84133)    |                |                 |              |                |              |              |              |                |
| HOXA3(3200)     |                |                 |              |                |              |              |              |                |
| RGCC(28984)     |                |                 |              |                |              |              |              |                |
| TUBB(203068)    |                |                 |              |                |              |              |              |                |
| DDX41(51428)    |                |                 |              |                |              |              |              |                |
| DLG7(9787)      |                |                 |              |                |              |              |              |                |
| NOLC1(9221)     |                |                 |              |                |              |              |              |                |
| CDC2(983)       |                |                 |              |                |              |              |              |                |
| GTF3C1(2975)    |                |                 |              |                |              |              |              |                |
| UBIAD1(29914)   |                |                 |              |                |              |              |              |                |
| VDAC1(7416)     |                |                 |              |                |              |              |              |                |
| ZFP36L2(678)    |                |                 |              |                |              |              |              |                |
| NEIL3(55247)    |                |                 |              |                |              |              |              |                |
| CIT7(11113)     |                |                 |              |                |              |              |              |                |
| PARP2(10038)    |                |                 |              |                |              |              |              |                |
| TAOK2(9344)     |                |                 |              |                |              |              |              |                |
| PXMP2(5827)     |                |                 |              |                |              |              |              |                |
| XRCC6(2547)     |                |                 |              |                |              |              |              |                |
| BCS1L(617)      |                |                 |              |                |              |              |              |                |
| WDR76(79968)    |                |                 |              |                |              |              |              |                |
| GF11(2672)      |                |                 |              |                |              |              |              |                |
| ANK1(286)       |                |                 |              |                |              |              |              |                |
| ALOX15(246)     |                |                 |              |                |              |              |              |                |
| RABL5(64792)    |                |                 |              |                |              |              |              |                |
| CDCA2(157313)   |                |                 |              |                |              |              |              |                |
| CDCA8(55143)    |                |                 |              |                |              |              |              |                |
| GTSE1(51512)    |                |                 |              |                |              |              |              |                |
| PKP2(5318)      |                |                 |              |                |              |              |              |                |
| CSNK2A1(1457)   |                |                 |              |                |              |              |              |                |
| MYB(4602)       |                |                 |              |                |              |              |              |                |
| MRPL1(65008)    |                |                 |              |                |              |              |              |                |
| HMG2(3151)      |                |                 |              |                |              |              |              |                |
| C2orf29(55571)  |                |                 |              |                |              |              |              |                |
| NASP(4678)      |                |                 |              |                |              |              |              |                |
| VAT1(10493)     |                |                 |              |                |              |              |              |                |
| GSTCD(79807)    |                |                 |              |                |              |              |              |                |
| CAND1(55832)    |                |                 |              |                |              |              |              |                |
| AHSA1(10598)    |                |                 |              |                |              |              |              |                |
| USP10(9100)     |                |                 |              |                |              |              |              |                |
| TSSC1(7260)     |                |                 |              |                |              |              |              |                |
| NDUFB3(4709)    |                |                 |              |                |              |              |              |                |
